1 **The choice-wide behavioral association study: data-driven**  
2 **identification of interpretable behavioral components**

3 David B. Kastner<sup>1,4</sup>, Greer Williams<sup>1</sup>, Cristofer Holobetz<sup>1</sup>, Joseph P. Romano<sup>2</sup>, Peter Dayan<sup>3</sup>

4 <sup>1</sup>*Department of Psychiatry and Behavioral Sciences, University of California, San Francisco, CA*  
5 *94143, USA*

6 <sup>2</sup>*Department of Statistics, Stanford University, Stanford, CA 94305, USA*

7 <sup>3</sup>*Max Planck Institute for Biological Cybernetics, Tübingen 72076, Germany*

8 <sup>4</sup>Lead Contact

9 Correspondence: David B. Kastner: [david.kastner2@ucsf.edu](mailto:david.kastner2@ucsf.edu)

10

## 11 Abstract

12 **Behavior contains rich structure across many timescales, but there is a dearth of methods to**  
13 **identify relevant components, especially over the longer periods required for learning and**  
14 **decision-making. Inspired by the goals and techniques of genome-wide association studies,**  
15 **we present a data-driven method—the choice-wide behavioral association study: CBAS—that**  
16 **systematically identifies such behavioral features. CBAS uses powerful, resampling-based,**  
17 **methods of multiple comparisons correction<sup>1–3</sup> to identify sequences of actions or choices**  
18 **that either differ significantly between groups or significantly correlate with a covariate of**  
19 **interest. We apply CBAS to different tasks and species (flies<sup>4</sup>, rats<sup>5</sup>, and humans<sup>6</sup>) and find, in**  
20 **all instances, that it provides interpretable information about each behavioral task.**

21 Understanding how behavior differs between different groups of humans or other  
22 animals is critical for generating and testing hypotheses about the functional role of genes,  
23 regions of the brain, and neural circuits, and is central to characterizing neurological and  
24 psychiatric dysfunction<sup>7</sup>. However, behavior is highly complex, evolving over multiple  
25 timescales and exhibiting substantial path dependencies due to individual experience<sup>8–12</sup>. It is  
26 increasingly possible to automate behavioral paradigms, and for computational methods to  
27 revolutionize behavioral analyses<sup>13–22</sup>. The latter come in two main flavors<sup>23,24</sup>: model-based, or  
28 top-down approaches, and data-driven, or bottom-up approaches. The former are substantially  
29 more prevalent than the latter; we offer a partial corrective.

30 In model-based analyses, behavioral data, such as choices in a decision-making task, are  
31 processed under the specific assumptions of a hypothesis or model. If the model or hypothesis  
32 is correct, this is highly efficient, since large volumes of data can be reduced to a handful of  
33 parameters that index semantically meaningful phenotypes, such as learning rates or  
34 differential sensitivity to rewards or punishments. These parameters can then be compared  
35 between the groups. However, even when substantial effort is put into building multiple  
36 alternative models, and comparing them in a statistically rigorous manner, it remains possible  
37 that the best fitting model nevertheless fails to characterize the behavior properly, rendering  
38 nugatory any interpretation of group comparisons. Additionally, with such approaches,  
39 confirmation bias<sup>25</sup> presents a significant challenge for accurate interpretation. Furthermore, in  
40 the worst of cases, model and hypothesis-based analyses provides a post-hoc framework for  
41 explaining any difference that can be found in a behavioral dataset<sup>26</sup>. Modern machine learning  
42 methods<sup>27,28</sup> can provide useful lower bounds for how well hypothesis-driven models should fit,  
43 but these approaches lack interpretability and data efficiency.

44 Data-driven analyses start from the other end, taking, and then characterizing, behavior  
45 without relying on parametric assumptions, and making very few assumptions about how the  
46 data is generated. Some of these approaches are unsupervised, for instance finding clusters in  
47 behavioral space and defining them as ‘syllables’ which can subsequently be compared  
48 between groups<sup>18,29,30</sup>; others are more supervised, directly looking for discriminative  
49 differences between populations or individuals<sup>13–16</sup>. By not trying to force data into a limited set  
50 of parameters, these methods should be more sensitive; however, comparisons between  
51 groups pose severe statistical challenges, because of the complexity and dimensionality of  
52 behavioral datasets.

53 Here, we present the choice-wide behavioral association study (CBAS), a data-driven  
54 analysis method designed to identify relevant sequences of choices (or other discrete  
55 behavioral features) made by subjects. CBAS has two components: 1) breaking down behavior  
56 into a comprehensive language for comparison between two groups or correlation with a  
57 covariate of interest; and 2) using rigorous, resampling-based, statistical corrections to account  
58 for the resulting large number of comparisons and maintain statistical power despite  
59 correlations in the data.

## 60 **Choice as a common discretization for behavior**

61 In developing our analysis, we were motivated by the data-driven approach of genome-  
62 wide association studies (GWAS), whole exome sequencing (WES) and whole genome  
63 sequencing (WGS)<sup>31</sup>. In some ways, the state of behavioral analysis in systems neuroscience  
64 resembles the state of genetic analysis prior to GWAS/WES/WGS, where studies attempted to  
65 associate candidate genes with phenotypes. Candidate gene studies were often underpowered  
66 and failed to replicate<sup>32–34</sup>, reminiscent of aspects of behavioral analyses<sup>35</sup>.

67 GWAS/WES/WGS look for differences in base-pairs of the genome between groups of  
68 subjects. The large numbers of base pairs being compared in these studies necessitates  
69 statistical correction to enable reliable decisions about the significance of any differences  
70 found. The discrete nature of base-pairs and the ability to compare that set across subjects  
71 make GWAS/WES/WGS possible. To be able to develop a comparable method for behavioral  
72 analyses it is critical to identify an appropriate discretization of behavioral tasks. In many cases,  
73 choice provides just such a discretization (Fig 1). Indeed, there is evidence that, at a rather  
74 fundamental level, behavior occurs through discrete choices<sup>18,36</sup>. We use three tasks, in three  
75 diverse species—flies, humans, and rats—to show the breadth of applicability of CBAS.

76 Using choice as the basis of the comparison for the behavioral analysis requires an  
77 additional consideration beyond what is done for the genome with base-pairs. For  
78 GWAS/WES/WGS, an individual base pair can be a meaningful unit of information (although this  
79 is only a partial story<sup>37,38</sup>) that can be compared between subjects. This need not be the case  
80 for individual choices in behavior, whereby the choices that precede and follow a specific  
81 choice can change the meaning of that choice. In this case, the relevant behavioral feature is a  
82 whole sequence of choices. Therefore, CBAS does not just evaluate the occurrence of individual  
83 choices, but, rather, the occurrence of all sequences up to a certain, user-defined, length. In  
84 general, the longer the sequence length, the more data and computing time will be necessary.

85 Evaluating the occurrence of all sequences of choices up to a certain length, causes a  
86 complexity, when it comes to correcting for the many comparisons, since, the sequences can be  
87 highly correlated. Standard methods to correct statistically for multiple comparisons (e.g.  
88 Bonferroni, Holm, Benjamini-Hochberg, Benjamini-Yekutieli) are either incorrect or  
89 underpowered for correlated data. Therefore, we instead use an approach based on resampling  
90 to correct for the multiple comparisons, which retains power in the face of correlations<sup>1</sup>.

## 91 **CBAS identifies interpretable differences for fly y-maze**

92 The first task we considered involves drosophila walking on a y-maze (Fig 1a). The  
93 movement of flies on the maze is tracked as they make the choice of going to either the left or

94 right arm after leaving the previous arm<sup>4</sup>. This left/right discretization of the task has enabled  
95 many conclusions about the genetic nature of individual variability<sup>4,39–43</sup>. Here, we compare the  
96 choices of two outbred strains of fly. Analyses in the original paper<sup>4</sup> identified some clear  
97 indications about the difference; however, the data provide a useful testing ground for CBAS  
98 since there are many subjects and the results are relatively low-dimensional.

99         When deciding to perform a data-driven genomics method, there are still decisions that  
100 need to be made. For instance, deciding to focus on only exome sequences in WES, or SNPs in  
101 GWAS. Similarly, to run CBAS, a few decisions need to be made about how to structure the data  
102 (Fig 2a). These decisions are important, and are not normally pre-determined directly by the  
103 data. Any conclusions drawn need to be interpreted in their light.

104         The first decision is the possible choices that will make up the sequences used in CBAS.  
105 We refer to this as the basic language for the application of CBAS. For the fly task, the language  
106 is left or right turns. Next, as described above, a decision needs to be made about the maximum  
107 number of choices in a row that will make up all the sequences used in CBAS. For the fly task,  
108 we chose a maximum sequence length of 10 choices in a row. That means that CBAS evaluates  
109 all sequences from length 1 – 10 that exist in the dataset.

110         CBAS then works through evaluating the average sequence count for each sequence,  
111 which we refer to as the rate of that sequence. The rate is calculated by counting the total  
112 number of times that sequence occurs in the population divided by the number of individuals in  
113 the population. To be precise about the occurrence of the sequence, a decision needs to be  
114 made about the number of trials over which this is counted, i.e. a criterion. The same criterion  
115 is applied to all subjects. For the fly task, we use the first 250 turns as that criterion. The last  
116 decision that needs to be made is what to do with subjects that do not reach the criterion. For  
117 the fly task, we exclude the subjects that do not reach criterion.

118         Given these decisions, we performed a CBAS comparing two outbred strains of flies,  
119 Cambridge-A (CA) and w1118, from a publicly available dataset<sup>4</sup>. The w1118 strain is the  
120 background strain for many transgenic flies<sup>4</sup>. For each sequence of left/right turns up to 10  
121 turns long, the rate was calculated for the two strains (Fig 2b). Using the Romano-Wolf  
122 resampling-based multiple comparisons correction<sup>1,2</sup> (see methods), we determined which  
123 sequences the two strains utilize significantly differently (Fig 2c). As a significance threshold, we  
124 use median control of the false discovery proportion at 5%, which is comparable to 5% false  
125 discovery rate (FDR) for the resampling-based method<sup>2</sup> (see methods).

126         CBAS identifies many sequences that differ significantly between the CA and w1118  
127 lines, some of which are shown in Fig. 2d. Upon inspection of the sequences, a clear,  
128 interpretable, difference is apparent between those sequences that occur more in the CA line  
129 and those that occur more in the w1118 line (Fig 2d&e). The CA line utilizes sequences with  
130 extended numbers of the same turn in a row, whereas the w1118 line utilizes sequences with  
131 more frequent changes in turn direction. Therefore, CBAS not only identifies that there is a  
132 difference between the two fly lines, but it also provides information to support an  
133 interpretation as to the nature of the difference.

134 Data-driven methods invariably need more data than hypothesis-driven methods. To  
135 estimate the sample size needed for appropriately powered experiments to detect any  
136 difference between these two fly lines, we took advantage of the large dataset to resample  
137 groups of smaller sizes from the data and recalculate the CBAS for each set of resampled  
138 groups. We generated an estimate of the power for different number of flies per group (Fig 2f)  
139 (see methods), by comparing the number of significant sequences identified by CBAS when  
140 comparing CA to w1118 to the number of significant sequences identified by CBAS when  
141 comparing the lines to themselves (Fig S1b). With 40 flies per group, CBAS has an estimated  
142 power >80% to distinguish the CA and w1118 lines.

### 143 **Graceful decay of CBAS output with decreasing group size**

144 The power calculation concerns the ability of CBAS to distinguish between the two  
145 strains. A more refined question is what the nature and comprehensiveness of the collection of  
146 significantly different sequences would be as smaller numbers of flies per group are analyzed.  
147 This would determine our ability to derive interpretations from fewer subjects.

148 We first evaluated the number of significant sequences identified from smaller group  
149 sizes as a fraction of the total number of significant sequences identified with the full dataset  
150 (Fig 3a). As expected, with smaller group sizes, we find fewer overall sequences; however,  
151 across the range of group sizes evaluated, the median fraction of sequences was larger than the  
152 fraction of the population being used in the smaller group CBAS (Fig 3a). This indicates that, for  
153 this dataset at smaller group sizes, the proportion of sequences identified by CBAS grows faster  
154 than the proportion of subjects in the CBAS. This provides a rapid increase in the amount of  
155 information provided by CBAS as sample size increases.

156 We next evaluated the fraction of the sequences identified by CBAS for the smaller sized  
157 groups that are not identified in the CBAS on the full dataset. Since we control the false  
158 discovery proportion and not the family-wise error rate, we do not expect this value to be zero;  
159 however, it was consistently small across all the group sizes evaluated (Fig 3b). The medians  
160 across the different repeats of the same sample sizes across the different sample sizes are all  
161 less than 2%.

162 Then, we evaluated the similarity of the sequences identified by CBAS with  
163 nonoverlapping sets of subjects with the same group size (Fig 3c). At smaller groups sizes, this  
164 overlap could be quite low (median 24.4%), even though there was sufficient evidence to  
165 discriminate the strains (Fig. 2f). This means that the specific sequences identified by CBAS can  
166 be quite variable from one experiment to the next, especially at smaller group sizes. Given that,  
167 we sought to understand if the structure of the sequences comported with the conclusion from  
168 the full dataset—that the CA line uses more of the same turns in a row and the w1118 line  
169 more frequent changes in direction of turn. Even though the overlap between CBAS on  
170 different groups might not be that high (Fig. 3c), the sequences identified still follow the same  
171 structure as the full dataset in regard to number of the same turns in a row, (Fig 3d). As the  
172 group size increases the output of CBAS consistently becomes more similar to the results from  
173 the full dataset (Fig 3e), licensing more generalized conclusions.

### 174 **CBAS provides evidence for testing model-based analysis**

175           The second task we considered, is the two-step task developed to test the interplay  
176 between model-based and model-free (reinforcement) learning (Fig 1b)<sup>44</sup>. In this task, subjects  
177 choose between pairs of images at two different stages. The image choice at the first stage  
178 governs the pair of images from which the subject can chose at the second stage. Following  
179 image choice at stage two, reward is delivered based on dynamic probabilities associated with  
180 each of the images. Model-based analyses of variants of this task have led to conclusions about  
181 the algorithms used in different brains regions<sup>44,45</sup> and differences that underlie psychiatric  
182 symptoms<sup>6</sup>; however, the interpretations are not without controversy<sup>46</sup>, and the complexity of  
183 behavior makes it difficult to evaluate ways in which the model might be missing features in the  
184 data.

185           To test the ability for CBAS to provide useful information in such a situation, we  
186 evaluated the open-source dataset from Gillan et al<sup>6</sup>. In that work, a large population of human  
187 subjects performed the two-step task, and also answered a series of psychiatric symptom  
188 questionnaires. The authors performed factor analysis on the different questionnaires and  
189 found that factor 2, which they associated with intrusive thoughts and compulsive behavior,  
190 had significant association with the way subjects performed that task. They found that subjects'  
191 factor 2 score was negatively associated with model-based decision making, leading to their  
192 conclusion that the greater the loading on intrusive thoughts and compulsive behavior for a  
193 person, the less likely they were to utilize model-based decision making on the two-step task.

194           There were two different groups to compare in the fly dataset. In this dataset the  
195 relevant comparison is correlation with a covariate (i.e. factor 2 score from the psychiatric  
196 symptom questionnaires)<sup>6</sup>. Therefore, we extended CBAS to identify the sequences that  
197 significantly correlate with this particular factor score (see methods). As with the CBAS applied  
198 to the fly data, there are decisions that need to be made to apply CBAS to this human dataset  
199 (Fig 4a). For this CBAS, the language is comprised of 8 different units: choosing image 1 or 2;  
200 making a choice within set A or set B, distinguishing A and B depending on whether a reward  
201 was delivered (shown in the figure as bold and underlined); and making 'no choice' (either at  
202 the first or second image), which occurs in the data, albeit rarely. Following Akam et al.<sup>45</sup> we  
203 collapsed image 3 and 4 into set A and image 5 and 6 into set B because the specific images  
204 within the set are not relevant for the critical decision at the first stage. We ran CBAS on all  
205 sequences up to 4 choices long and evaluated the rate of the sequences over the 400 choices of  
206 the dataset (200 trials of the two-step task). In the open-source dataset, there was no subject  
207 who did not reach criterion.

208           CBAS evaluated the correlation between the usage of each sequence and the factor 2  
209 score (Fig 4b&S2a). Multiple sequences were significantly correlated (Fig 4c&d). To understand  
210 the output of CBAS, we review the expectation associated with the hypothesis-driven analysis  
211 of this experiment. This task was designed to evaluate the interplay between model-based and  
212 model-free decision making<sup>44</sup>. Model-based decision making develops an understanding of the  
213 structure of the world (i.e. the model) and makes choices based on that understanding. Model-  
214 free decision making makes choices based on reinforced past successful actions, without  
215 developing an understanding of the structure of the world. A way to see the difference  
216 between these two decision-making schemes is when a reward is delivered at set A ('**A**' in our  
217 language) after having come from image 2. A regular model-free learner will reinforce the visits

218 to both 2 and A and will therefore be more likely to choose 2 on the next trial. The model-based  
219 learner will have an understanding that choosing image 1 on the next opportunity makes it  
220 more likely to return to set A (because of the common/rare transition structure in the  
221 environment) and will therefore chose object 1<sup>44</sup>.

222 Instead of identifying correlations with sequences that relate to either the model-free or  
223 model-based learning, CBAS instead identifies a positive correlation with many sequences  
224 involving being rewarded at A and then selecting image 2 or being rewarded at B and then  
225 selecting image 1 (Fig 4d). Just as it was helpful with the fly data to find complete sets of  
226 sequences that were significant (e.g. all of the sequences that occurred in the data with 10 left  
227 or right turns in a row were identified as happening more in CA than w1118, etc.) we were also  
228 able to find practically complete sets of sequences that were identified as being positively  
229 correlated with the factor 2 score. Practically all of the sequences in the dataset that contained  
230 **1A2** or **2B1**, were significantly correlated with this score; whereas none of the sequences with  
231 **1B1** was identified as significant (and there were no instances of **2A2** in the dataset)  
232 (Fig4e&S2b).

233 Sequences **1A2** or **2B1** can be classified as anti-model-based decisions. The subjects get  
234 rewarded after choosing from the common side (A from 1 or B from 2), but then selects the  
235 image that will rarely bring them back to the previously rewarded side (2 from A or 1 from B).  
236 CBAS therefore identifies that anti-model-based learning is a prominent feature that correlates  
237 with intrusive thought and compulsive behavior loading. Further experimentation will be  
238 needed to understand the interplay between this mode of decision making, the task, and these  
239 symptoms scales.

240 As with the fly data, we could evaluate the sample size needed to reach a given  
241 statistical power for identifying any significant correlation between the factor 2 score and this  
242 task. We resampled smaller group sizes and compared the CBAS for the true relationship  
243 between the sequence counts and factor 2 score to a randomly generated set of factor 2 score  
244 values that was drawn from the same distribution as the data (Fig S2c). A sample size of 900  
245 individual provides a power >80% to detect significant correlations between the factor 2 score  
246 and the subject (Fig 4f), which compares favorably to the sample size of ~1,200 – 1,600 subjects  
247 that Gillan et al. calculated to generate their dataset<sup>6</sup>.

## 248 **CBAS identifies a phenotype consistent with ASD in *Scn2a* haploinsufficient rats**

249 The third task we considered, involves spatial alternation behavior in rats. For this task,  
250 to get reward, the rats must alternate between pairs of arms of a track whilst visiting a different  
251 arm of the track in between (Fig 1c). Spatial alternation is a common behavioral paradigm for  
252 phenotyping and neurophysiology, and the discretization of the behavior into the arms chosen  
253 by the animals forms the basis of many of the conclusions from these studies<sup>47–51</sup>. However, our  
254 recent work calls into question the assumptions and hypothesis that motivate the standard  
255 analysis for spatial alternation behavior<sup>5,52</sup>. Even though we developed reinforcement learning  
256 agents to fit individual behavior, those agents showed clear differences from the way the  
257 animals learned<sup>5</sup>, limiting their use for phenotyping. Therefore, we applied CBAS.

258 We sought to discriminate wild-type (WT) rats from those haploinsufficient for *Scn2a*  
259 (*Scn2a*<sup>+/-</sup>), a high confidence, large effect, autism spectrum disorder (ASD) risk gene<sup>53,54</sup>. We  
260 collected a dataset of over 200 rats performing six different spatial alternation contingencies  
261 using our previously described automated behavioral system<sup>5</sup> (see methods). Each spatial  
262 alternation contingency was defined by the three arms of the track where alternation needed  
263 to occur to get reward. For example, if the contingency was at arms 2, 3, and 4, reward would  
264 be provided for every arm visit in the sequence 3-4-3-2-3-4.

265 The language for the spatial alternation CBAS was visiting each arm of the track and not  
266 getting reward and visiting the goal arms and getting reward. That means that within each  
267 contingency there were a total of 9 possibilities—6 unrewarded arms and 3 rewarded arms. For  
268 example, if the contingency was at arms 2, 3, and 4, the language is composed of visiting arms  
269 1, 2, 3, 4, 5, or 6 and not getting rewarded or visiting arms 2, 3, or 4, and getting rewarded.  
270 Each contingency was considered separately, as visiting a sequence of arms during one  
271 contingency likely means something different than visiting those same arms in a different  
272 contingency. We chose to evaluate all sequences up to six choices long. For the criterion, we  
273 used the trial at which each animal reached 100 perfect performance sequences four choices  
274 long for each contingency, and we included animals that did not reach the criterion (Fig 5a) (see  
275 methods).

276 In running the CBAS on this dataset, we evaluated the rate difference of >86,000  
277 sequences across the six different contingencies, with a total of 1,476 sequences being  
278 identified as significantly different between the *Scn2a*<sup>+/-</sup> and WT littermates (Fig 5b&c). To  
279 interpret common features of those sequences, we sought categories of sequences for which a  
280 substantial fraction was identified as being significantly different between the groups: the  
281 strategy that was informative for the fly and human datasets (Fig 2e&4e). One common feature  
282 of spatial alternation behavior is the 3-arm structure of each contingency (e.g. arms 2, 3, and 4  
283 are the only arms with the potential to be rewarded during contingency A and E). Therefore, in  
284 all contingencies, we evaluated all sequences that exclusively contained all sets of three arms.  
285 For example, within a contingency we identified all sequences exclusively containing arms 2, 3,  
286 and 4, which means that every sequence within that category only contains visits to arms 2, 3,  
287 and 4 (but does not have to visit all of the arms). We did this with sets of three arms,  
288 independent of whether the choice was rewarded or not, as well as the set of three arms in a  
289 contingency that were all rewarded. There are 21 sets of three arms for each contingency, and,  
290 consistent with the relevance of these sets for the behavior, across all contingencies they  
291 contained only ~25% of all the sequences that the rats performed during the experiment, but  
292 ~75% of all of the significant sequences (Fig S3a).

293 Some of these sets of 3 arms are clearly interpretable. One such is the set of three arms  
294 from the current contingency, which contains all sequences where the animal exclusively visits  
295 the arms of the contingency but could make errors in the order of those arm visits (Fig 5d; left).  
296 A second interpretable set consists of three arms from the current contingency that are  
297 rewarded, which contains all sequences where the animal consistently performs the task  
298 correctly. A third and fourth are the sets of three arms exclusively containing the previous (Fig  
299 5d; right), or the one before previous, contingency arms, which contain sequences where the  
300 animals repeat prior actions that are no longer optimally rewarded.



301 For all sets of three arms, in all the contingencies we tabulated the fraction of the total  
302 sequences in the set that were significant either for WT > *Scn2a*<sup>+/-</sup> or WT < *Scn2a*<sup>+/-</sup>. We then  
303 asked if any of these fractions were larger than would be expected from randomly distributing  
304 the significant sequences across all possible sequence types within the entire category of sets  
305 of three arms (see methods) and found consistent patterns in how the WT and *Scn2a*<sup>+/-</sup> rats  
306 differed (Fig 5e). In 4 out of the 6 contingencies, *Scn2a*<sup>+/-</sup> rats showed increased usage of  
307 sequences containing the current contingency, and in 3 out of the 6 contingencies, *Scn2a*<sup>+/-</sup> rats  
308 also showed increased usage of sequences related to prior contingencies (either 1 or 2  
309 contingencies back). By contrast, in 4 out of the 6 contingencies the WT rats showed increased  
310 usage of sequences containing the rewarded arms of the current contingency. This indicates  
311 that WT rats are ultimately better at performing spatial alternation behavior than *Scn2a*<sup>+/-</sup> rats,  
312 and that *Scn2a*<sup>+/-</sup> rats show difficulty transitioning from prior actions, repeating sequences  
313 from prior contingencies, possibly consistent with restrictive and repetitive actions, which  
314 forms one of the diagnostic criteria for ASD<sup>55</sup>.

315 As with the fly and human data, we could evaluate the sample size needed to reach a  
316 given statistical power to detect any difference between these genotypes. We resampled  
317 smaller group sizes and compared the CBAS for the comparison between the WT and *Scn2a*<sup>+/-</sup>  
318 rats to the comparison between WT and itself and *Scn2a*<sup>+/-</sup> and itself (Fig S3b). A sample size of  
319 30 rats per group provides a power >80% to detect a difference between the two genotypes  
320 (Fig 5f).

321 We have presented a general behavioral analysis method, CBAS, for identifying  
322 interpretable behavioral components that is grounded in sequences of choices made by  
323 subjects. There has been significant progress, in recent years, in tracking and analyzing, short  
324 timescale actions of subjects<sup>13-22</sup>; however, we lack methods for generally analyzing and  
325 interpreting sequences of these actions or long-run choices and decisions of subjects during  
326 behavior. CBAS provides just such a method and is applicable across a wide array of species and  
327 different behavioral paradigms (Fig 1). It can be used to test models and hypotheses (Fig 2&4),  
328 and, for instance, using generalizable simple principles about the relationship between  
329 sequences and task contingencies, it can generate hypotheses in complex behaviors where  
330 reliable computational understanding has yet to emerge (Fig 5). Through taking advantage of  
331 large-scale data collection and rigorous statistical methods, CBAS has the potential to transform  
332 our use of behavior in a comparable way to the ways that GWAS/WES/WGS changed the  
333 paradigm for genomic studies.

## 334 **Methods**

335 **Animals:** All experiments on rats were conducted in accordance with University of California  
336 San Francisco Institutional Animal Care and Use Committee and US National Institutes of Health  
337 guidelines. Rats were fed standard rat chow (LabDiet 5001). To motivate the rats to perform  
338 the task, reward was sweetened evaporated milk: 25 g of sugar per can (354 ml) of evaporated  
339 milk (Carnation). The rats were food restricted to ~85% of their basal body weight.

340 The *Scn2a* mutant rats were generated due to funding from the Simons Foundation  
341 Autism Research Initiative. Long Evans *Scn2a* mutant animals (LE-*Scn2a*<sup>em1Mcwi</sup>,

342 RRID:RGD\_25394530) were generated at the Medical College of Wisconsin and shipped to the  
343 University of California San Francisco for this study. Briefly, a single guide RNA targeting the  
344 sequence GTGAAATCCAACCAATTCCA sequence within exon 5 of *Scn2a* was mixed with Cas9 (*S.*  
345 *pyogenes*) protein (QB3 MacroLab, UC Berkeley) and injected into the pronucleus of fertilized  
346 Long Evans (Crl:LE, Charles River Laboratories) embryos. Among the resulting offspring, a  
347 mutant founder was identified harboring a net 4-bp deletion allele consisting of a 10-bp  
348 deletion (rn7: chr3:50,364,411-50,364,420) along with a 6-bp insertion of TTCACT, inducing a  
349 frameshift in the coding sequence predicted to truncate the normal protein after 193 amino  
350 acids. The founder was backcrossed to the parental Crl:LE strain to establish a breeding colony.

351 **Spatial alternation behavior:** The automated behavior system for spatial alternation behavior  
352 was previously described<sup>5</sup>. There are different symbols on each arm of the track serving as  
353 proximal cues, and there are distal cues distinguishing the different walls of the room.  
354 Pneumatic pistons (Clippard) open and close the doors. Python scripts, run through Trodes  
355 (Spike Gadgets), control the logic of the automated system. The reward wells contain an  
356 infrared beam adjacent to the reward spigot. The automated system uses the breakage of that  
357 infrared beam to progress through the logic of the behavior. In addition to the infrared beam  
358 and the spigot to deliver the reward, each reward well has an associated white light LED.

359 Each cohort of rats is divided into groups of four (or three) animals. The same groups  
360 were maintained throughout the duration of the experiment. Within a group, a given rat is  
361 always placed in the same rest box, and the four rats of a group serially perform the behavior.  
362 The rats have multiple sessions on the track each day. Prior to beginning the first spatial  
363 alternation contingency, the rats experience multiple days and sessions where they get  
364 rewarded at any arm that they visit (provided it is not an immediate repeat). During this period  
365 of the behavior, the duration of a session is defined by a fixed number of rewards, or a fixed  
366 amount of time on the track (15 minutes), whichever came first. During the alternation task the  
367 duration of a session was defined either by a fixed number of center arm visits and at least one  
368 subsequent visit to any other arm, or a fixed amount of time on the track (15 minutes),  
369 whichever came first.

370 The algorithm underlying the spatial alternation task is such that three arms on the track  
371 have the potential for reward within a given contingency, for example during a contingency at  
372 arms 2-3-4, arms 2, 3, and 4 have the potential to be rewarded, and arms 1, 5, and 6 do not. Of  
373 those three arms we refer to the middle of the three arms as the center arm (arm 3 in the  
374 above example) and the other two arms as the outer arms (arms 2 and 4 in the above example).  
375 Reward is delivered at the center arms if and only if: 1) the immediately preceding arm whose  
376 reward well infrared beam was broken was not the center arm. Reward was delivered at the  
377 outer two arms if and only if: 1) the immediately preceding arm whose reward well infrared  
378 beam was broken was the center arm, and 2) prior to breaking the infrared beam at the center  
379 arm, the most recently broken outer arm infrared beam was not the currently broken outer  
380 arm infrared beam. The one exception to the outer arm rules was at the beginning of a session,  
381 if no outer arm infrared beam was broken prior to the first infrared beam break at the center  
382 arm, then only the first condition had to be met.

383 For the running of the behavior, the infrared beam break determined an arm visit;  
384 however, the rats sometimes go down an arm, get very close to the reward wells, but do not  
385 break the infrared beam. Therefore, for all the analyses described for the rats, an arm choice is  
386 defined as when a rat gets close to a reward well. These times were extracted from a video  
387 recording of the behavior. These, effective, missed pokes were more frequent at the beginning  
388 of a contingency. This proximity-based definition of an arm visit added additional arm visits to  
389 those defined by the infrared beam breaks, and none of them could ever be rewarded, nor alter  
390 the logic of the underlying algorithm. However, because of the non-Markovian nature of the  
391 reward contingency, they could affect the rewards provided for subsequent choices.

392 A total of 121 WT (66 males, 55 females) and 120 *Scn2a*<sup>+/-</sup> (66 males, 54 females) rats  
393 were run on the spatial alternation task. WT and *Scn2a*<sup>+/-</sup> rats were littermates and were  
394 housed together prior to their being food restricted before the behavior. During the behavior  
395 and food restriction the rats were single housed. 1 WT rat died after finishing the first spatial  
396 alternation contingency, 1 WT rat died after finishing the fourth spatial alternation contingency,  
397 and 1 *Scn2a*<sup>+/-</sup> rat died after finishing the first spatial alternation contingency. The data from the  
398 animals that died was included up until their expiration. For the first contingency: 5/121 WT  
399 rats and 15/120 *Scn2a*<sup>+/-</sup> rats did not reach the CBAS criterion. For the second contingency:  
400 4/120 WT rats and 19/119 *Scn2a*<sup>+/-</sup> rats did not reach the CBAS criterion; for the third  
401 contingency: 4/120 WT rats and 12/119 *Scn2a*<sup>+/-</sup> rats did not reach the CBAS criterion; for the  
402 fourth contingency: 2/120 WT rats and 12/119 *Scn2a*<sup>+/-</sup> rats did not reach the CBAS criterion;  
403 for the fifth contingency: 4/119 WT rats and 14/119 *Scn2a*<sup>+/-</sup> rats did not reach the CBAS  
404 criterion; and for the sixth contingency: 3/119 WT rats and 12/119 *Scn2a*<sup>+/-</sup> rats did not reach  
405 the CBAS criterion.

406 **Romano-Wolf resampling based multiple comparisons correction:** We follow the terminology  
407 and description laid out in Clarke et. al<sup>56</sup> to describe the Romano-Wolf multiple comparison  
408 correction. First, we describe the way the method corrects for the family-wise error rate  
409 (FWER) and then explain how the procedure is extended to provide median control of the false  
410 discovery proportion. FWER control at a level of  $\alpha$  means that across all comparisons there is a  
411  $\alpha$  percent chance of having at least one false positive rejection of a null hypothesis. The  
412 Romano-Wolf procedure provides FWER control through resampling the data<sup>1</sup>. It tests a total of  
413  $S$  hypotheses.

414 It is not generally known if the Romano-Wolf procedure controls for type III, or  
415 directional, errors. Type III errors are errors in the sign, or direction, of the conclusion. For  
416 example, if a statistical test provided information to reject the null hypothesis  $\theta_1 = \theta_2$ , and you  
417 then concluded that  $\theta_1 > \theta_2$ , when in fact  $\theta_1 < \theta_2$ . Therefore, instead of running a single two-  
418 tailed test for each sequence, we run two one-tailed tests for each sequence. Therefore, the  
419 total number of hypotheses tested,  $S$ , is twice the total number of sequences being compared.  
420 For CBAS those hypotheses take one of two forms: 1) the rate of each sequence ( $r_s$ ) is the same  
421 between two groups  $\Delta r_s = 0$ , or 2) that there is no correlation ( $\rho_s$ ) between each sequence and  
422 a covariate of interest,  $\rho_s = 0$ . For the one-tailed versions of each hypothesis, we ask if  $r_{s_1} -$   
423  $r_{s_2} > 0$  and  $r_{s_2} - r_{s_1} > 0$  for the comparison CBAS, where  $r_{s_N}$  is the rate of sequence  $s$  for  
424 group  $N$ , or if  $\rho_s > 0$  and  $\rho_s < 0$  for the correlational CBAS.

425 The first step in the procedure is to create a studentized test statistic for each  
 426 hypothesis. The studentization is different based on whether the CBAS is comparing two groups  
 427 or calculating a correlation. In the case where two groups are being compared:

$$t_s = \frac{\Delta r_s}{\sigma_s} \quad (7)$$

428 where  $\sigma_s$  is the standard error of  $\Delta r_s$ , which we calculate by combining the standard error of  
 429 the mean of the rate for each group using error propagation, i.e.  $\sigma_s = \sqrt{\sigma_{s_1}^2 + \sigma_{s_2}^2}$ , where  $\sigma_{s_N}$   
 430 is the standard error of the occurrence rate of sequence  $s$  for group  $N$ .

431 In the case where the correlation is being calculated the studentized test statistic<sup>3</sup> is:

$$t_s = \frac{\sqrt{n}\hat{\rho}_n}{\hat{t}_n} \quad (8)$$

432  
 433 where:

$$\hat{\rho}_s = \frac{\sum X_i Y_i - n\bar{X}_s\bar{Y}}{\sqrt{\sum(X_i - \bar{X}_n)^2 \sum(Y_i - \bar{Y})^2}} \quad (9)$$

$$\hat{t}_s = \frac{\sqrt{\frac{1}{n}\sum_{i=1}^n(X_i - \bar{X}_s)^2(Y_i - \bar{Y})^2}}{\sqrt{\frac{1}{n}\sum_{i=1}^n(X_i - \bar{X}_s)^2} \sqrt{\frac{1}{n}\sum_{i=1}^n(Y_i - \bar{Y})^2}} \quad (10)$$

434 For eq. 8, 9, and 10,  $n$  is the number of subjects for which the correlation is being calculated,  $X_i$   
 435 and  $Y_i$  and the values of the metrics being correlated (in our case, the sequence count and  
 436 factor 2 score for each individual respectively),  $\bar{X}_s$  is the mean sequence count for the specific  
 437 sequence being considered, and  $\bar{Y}$  is the mean of the covariate of interest (factor 2 score, which  
 438 is the same for any sequence).

439 When two groups are being compared, we resample from the entire population with  
 440 replacement (separately for each group) and build up a null distribution by bootstrapping  $M$   
 441 times. The test statistic from the  $m^{th}$  bootstrap sample for  $m = 1, \dots, M$  is:

$$t_s^{*,m} = \frac{\Delta r_s^{*,m}}{\sigma_s^{*,m}} \quad (11)$$

442 where,  $\Delta r_s^{*,m}$  is the difference in the rate of each sequence whilst resampling, with  
 443 replacement, from the entire population, ignoring the group labels.  $\sigma_s^{*,m}$  is the accompanying  
 444 standard error of the resampled groups. The resampled group sizes are the same as the two  
 445 groups of interest.

446 In the case where the correlation is being calculated, the test statistic based on the  $m^{th}$   
 447 bootstrap sample is:

$$t_s^{*,m} = \frac{\sqrt{n}\hat{\rho}_s^{*,m}}{\hat{\tau}_s^{*,m}} \quad (12)$$

448 where,  $\hat{\rho}_s^{*,m}$  is the correlations of each sequence whilst resampling, with replacement, from the  
 449 entire population, ignoring the group labels.  $\hat{\tau}_s^{*,m}$  is the accompanying normalization factor of  
 450 the resampled groups. The resampled group size is the same as the original.

451 We used a value of  $M = 10,000$ . Importantly, for each individual resampling,  $m$ , the  
 452 same resampled set is used for all sequences.

453 The test statistics, and their accompanying estimators are ordered from largest to  
 454 smallest values. This creates a  $M \times S$  matrix where each column contains all the estimators of  
 455 the test statistics. The first column contains the estimators from the largest test statistic, the  
 456 second column contains the estimators from the second largest, etc.

457 To define the distribution for which each test statistic is compared, which then  
 458 determines the adjusted p-value, the following algorithm is used. The first sequence considered  
 459 is the one with the maximum test statistic,  $t_s$ . Its comparison distribution is defined as the  
 460 maximum value within each row of the matrix of estimators of the test statistic:

$$\max(t^{*,m}) = \max\{t_1^{*,m}, \dots, t_S^{*,m}\} \quad (13)$$

461 which provides a total of  $M$  values,  $t^{*,m}$  (there is no longer an association with  $s$ , because these  
 462 values can come from a resampling of any of the sequences). Using those  $M$  values, the  
 463 adjusted p-value is calculated as follows:

$$p_s^{adj} = \frac{\#\{\max(t^{*,m}) \geq t_s\} + 1}{M + 1} \quad (14)$$

465 After calculating  $p_s^{adj}$  for the first sequence, the column with the test statistic  
 466 estimators generated from the first sequence is removed from the matrix. This now leaves a  
 467 matrix that is  $M \times (S - 1)$ . The above procedure is then used to calculate  $p_s^{adj}$  for the  
 468 sequence with the second largest test statistic, and then its column of test statistic estimators is  
 469 removed, etc until all  $p_s^{adj}$  have been calculated. Following the algorithm described in Clarke et  
 470 al.<sup>56</sup>, we enforce monotonicity of the p-values by resetting the p-value for each sequence:

$$p_s^{adj} = \max\{p_s^{adj}, p_{s-1}^{adj}\} \quad (15)$$

471 This is done prior to calculating the p-value for the next sequence.

472 To control the false discovery proportion (i.e., control the number of false positives  
 473 divided by the total number of hypotheses rejected), the idea of k-FWER is introduced<sup>2</sup>. For

474 control of the FWER,  $k$  is equal to 1, and that leads to an  $\alpha$  percent chance that there is at least  
475 1 false positive among all hypotheses rejected (most commonly  $\alpha = 0.05$ ). If  $k$  equals 2, then  
476 there is an  $\alpha$  percent chance that there are at least 2 false positives among all hypotheses  
477 rejected. Therefore, to get control of the false discovery proportion we need to find the  $k$  that  
478 provides the proportion of interest given the number of hypotheses rejected. So, if we want a  
479 false discovery proportion,  $\gamma$ , of 0.05, we need  $k \sim 0.05 \times$  number of hypotheses rejected.

480 Romano and Wolf also derived an algorithm to do just that. The algorithm is as follows.  
481 Start with  $k = 1$ . Apply the  $k$ -FWER procedure, and note the total number of hypotheses  
482 rejected,  $N$ . If  $N < \frac{k}{\gamma} - 1$ , stop and you have identified  $k$ . Otherwise, increase  $k$  by 1, and  
483 repeat<sup>2</sup>. The way you determine  $k$ -FWER is in eq. 13, instead of taking the maximum value in  
484 each row, you take the  $k^{\text{th}}$  largest value. Finally, to get median control of the false discovery  
485 proportion,  $\alpha = 0.5$ . This means that 50% of the time you will get a value greater than  $\gamma$ , and  
486 50% of the time you will get a value less than  $\gamma$ , leading to control of the median<sup>2</sup>. This is a  
487 similar decision to what is done when calculating the false discovery rate with Benjamini-  
488 Hochberg or Benjamini-Yekutieli, except the false discovery rate controls the mean of the false  
489 discovery proportion instead of the median.

490 **Power estimation for CBAS.** To estimate the statistical power of CBAS for a given sample size  
491 we resampled the dataset without replacement and ran a CBAS to determine the number of  
492 significant sequences. For each sample size we performed 20 repeats (Fig S1b, S2c, and S3b).  
493 We also ran a CBAS comparing each group to itself (for the fly and rat datasets) (Fig S1b and  
494 S3b), with 20 repeats for each group; or correlating the sequence counts with a randomly  
495 generated set of factor 2 scores drawn from the same distribution as the actual factor 2 scores  
496 (for the human dataset) (Fig S2c), with 40 repeats. Then for each sample size, the power is  
497 estimated by identifying the largest 20 values of significant sequences, and determining the  
498 fraction of those values that were generated by the comparison of the two groups or the  
499 correlation with the data with the actual factor 2 scores.

500 **Spatial alternation category fraction determination of significance.** There are a total of 20  
501 different sets of three arms, and 1 set of three arms with all choices being rewarded. For each  
502 of the six contingencies the fraction of sequences that exclusively contains the set of three arms  
503 that are significant is calculated separately for significant sequences greater in the WT and  
504 greater in the *Scn2a*<sup>+/-</sup>. That means that there a total of  $21 \times 2 \times 6 = 252$  fractions across all  
505 contingencies. To determine whether the fraction is significantly larger than expected by  
506 chance we proceeded as follows: Within a contingency, we determined the sequences that  
507 belonged to any of the 21 categories. Then, separately for sequences greater in WT and  
508 sequences greater in *Scn2a*<sup>+/-</sup>, we permuted the association between those sequences and  
509 whether or not they were significant. With that permuted association we recalculated the  
510 fraction of sequences in each category that were significant. We repeated that process 25,000  
511 times and determined significance by calculating the number of permuted fractions that were  
512 greater than or equal to the actual fraction value for each category and divided that by 25,001  
513 (as with eq. 15). That number was then corrected for multiple comparisons using the  
514 Bonferroni method and multiplied by 252, the number of tests being performed. Any category  
515 whose corrected p-value was  $< 0.05$ , was determined to be significantly larger than expected.

516 **Data availability.** Data will be made available upon reasonable request to the lead author.

517 **Code availability.** Code used to calculate CBAS will be posted to Github upon publication.

518 **Acknowledgements.** We thank Claire Gillan and Benjamin de Bivort for making their data  
519 publicly available. We thank Thomas Akam and Adam Frank for helpful comments on the  
520 manuscript. We thank the Simons Foundation Autism Research Initiative for supporting the  
521 generation of the *Scn2a*<sup>+/-</sup> rat line. This work was supported by grants from the Jane Coffin  
522 Childs Memorial Fund for Medical Research (D.B.K.), the UCSF Physician Scientist Scholars  
523 Program (D.B.K.), an NIH R25 (R25MH060482) (D.B.K.), a Simons Foundation Autism Research  
524 Initiative grant (899599) (D.B.K.), the Max Planck Society (P.D) and the Humboldt Foundation  
525 (P.D.). Some of the data used in this study were collected in the laboratory of Loren Frank at the  
526 University of California, San Francisco.

527 **Author Contributions.** D.B.K. and P.D. designed the study, D.B.K., J.P.R., and P.D. developed the  
528 analysis method, D.B.K., G.W., and C.H. collected the data, D.B.K. analyzed the data, D.B.K and  
529 P.D. wrote the manuscript, and D.B.K., J.P.R. and P.D. edited the manuscript.

530 **Declaration of interests.** The authors declare no competing interests.

- 531 1. Romano, J. P. & Wolf, M. Exact and Approximate Stepdown Methods for Multiple Hypothesis  
532 Testing. *J Am Stat Assoc* **100**, 94–108 (2005).
- 533 2. Romano, J. P. & Wolf, M. Control of generalized error rates in multiple testing. *Ann Statistics*  
534 **35**, 1378–1408 (2007).
- 535 3. DiCiccio, C. J. & Romano, J. P. Robust Permutation Tests For Correlation And Regression  
536 Coefficients. *J. Am. Stat. Assoc.* **112**, 1211–1220 (2017).
- 537 4. Buchanan, S. M., Kain, J. S. & Bivort, B. L. de. Neuronal control of locomotor handedness in  
538 *Drosophila*. *Proc National Acad Sci* **112**, 6700–6705 (2015).
- 539 5. Kastner, D. B. *et al.* Spatial preferences account for inter-animal variability during the  
540 continual learning of a dynamic cognitive task. *Cell Reports* **39**, 110708–110708 (2022).
- 541 6. Gillan, C. M., Kosinski, M., Whelan, R., Phelps, E. A. & Daw, N. D. Characterizing a psychiatric  
542 symptom dimension related to deficits in goal-directed control. *eLife* **5**, e11305 (2016).
- 543 7. Krakauer, J. W., Ghazanfar, A. A., Gomez-Marin, A., Maclver, M. A. & Poeppel, D.  
544 Neuroscience Needs Behavior: Correcting a Reductionist Bias. *Neuron* **93**, 480–490 (2017).
- 545 8. Bialek, W. On the dimensionality of behavior. *P Natl Acad Sci Usa* **119**, e2021860119 (2022).
- 546 9. Meister, M. Learning, fast and slow. *Curr Opin Neurobiol* **75**, 102555 (2022).
- 547 10. Gomez-Marin, A. & Ghazanfar, A. A. The Life of Behavior. *Neuron* **104**, 25–36 (2019).
- 548 11. Trillmich, F., Günther, A., Müller, C., Reinhold, K. & Sachser, N. New perspectives in  
549 behavioural development: adaptive shaping of behaviour over a lifetime? *Front Zool* **12**, S1  
550 (2015).
- 551 12. Dayan, P., Roiser, J. P. & Viding, E. The first steps on long marches: the costs of active  
552 observation. in *Rethinking Biopsychosocial Psychiatry*. (eds. Davies, W., Roache, R. & Savulescu,  
553 J.) (Rethinking Biopsychosocial Psychiatry., 2018).
- 554 13. Hession, L. E., Sabnis, G. S., Churchill, G. A. & Kumar, V. A machine-vision-based frailty index  
555 for mice. *Nat. Aging* **2**, 756–766 (2022).
- 556 14. Geuther, B. Q. *et al.* Action detection using a neural network elucidates the genetics of  
557 mouse grooming behavior. *eLife* **10**, e63207 (2021).
- 558 15. Geuther, B. *et al.* High-throughput visual assessment of sleep stages in mice using machine  
559 learning. *SLEEP* **45**, zsab260 (2021).



- 560 16. Sheppard, K. *et al.* Stride-level analysis of mouse open field behavior using deep-learning-  
561 based pose estimation. *Cell Rep.* **38**, 110231 (2022).
- 562 17. Weinreb, C. *et al.* Keypoint-MoSeq: parsing behavior by linking point tracking to pose  
563 dynamics. *bioRxiv* 2023.03.16.532307 (2023) doi:10.1101/2023.03.16.532307.
- 564 18. Wiltschko, A. B. *et al.* Mapping Sub-Second Structure in Mouse Behavior. *Neuron* **88**, 1121–  
565 1135 (2015).
- 566 19. Pereira, T. D. *et al.* Fast animal pose estimation using deep neural networks. *Nat. Methods*  
567 **16**, 117–125 (2019).
- 568 20. Pereira, T. D. *et al.* SLEAP: A deep learning system for multi-animal pose tracking. *Nat.*  
569 *Methods* **19**, 486–495 (2022).
- 570 21. Marshall, J. D. *et al.* Continuous Whole-Body 3D Kinematic Recordings across the Rodent  
571 Behavioral Repertoire. *Neuron* **109**, 420–437.e8 (2020).
- 572 22. Dunn, T. W. *et al.* Geometric deep learning enables 3D kinematic profiling across species  
573 and environments. *Nat. Methods* **18**, 564–573 (2021).
- 574 23. Huys, Q. J. M., Maia, T. V. & Frank, M. J. Computational psychiatry as a bridge from  
575 neuroscience to clinical applications. *Nat Neurosci* **19**, 404–413 (2016).
- 576 24. Kumar, P., Dayan, P. & Wolfers, T. From Complexity to Precision—Charting Decision-Making  
577 Through Normative Modeling. *JAMA Psychiatry* **81**, (2024).
- 578 25. Nickerson, R. S. Confirmation bias: A ubiquitous phenomenon in many guises. *Rev Gen*  
579 *Psychol* **2**, 175–220 (1998).
- 580 26. Kerr, N. L. HARKing: Hypothesizing After the Results are Known. *Pers Soc Psychol Rev* **2**,  
581 196–217 (1998).
- 582 27. Dezfouli, A., Griffiths, K., Ramos, F., Dayan, P. & Balleine, B. W. Models that learn how  
583 humans learn: The case of decision-making and its disorders. *PLoS Comput. Biol.* **15**, e1006903  
584 (2019).
- 585 28. Eckstein, M. K., Summerfield, C., Daw, N. D. & Miller, K. J. Predictive and Interpretable:  
586 Combining Artificial Neural Networks and Classic Cognitive Models to Understand Human  
587 Learning and Decision Making. *bioRxiv* 2023.05.17.541226 (2023)  
588 doi:10.1101/2023.05.17.541226.
- 589 29. Wiltschko, A. B. *et al.* Revealing the structure of pharmacobehavioral space through Motion  
590 Sequencing. *Nat. Neurosci.* **23**, 1433–1443 (2020).

- 591 30. Gschwind, T. *et al.* Hidden behavioral fingerprints in epilepsy. *Neuron* **111**, 1440-1452.e5  
592 (2023).
- 593 31. Uffelmann, E. *et al.* Genome-wide association studies. *Nat Rev Methods Primers* **1**, 59  
594 (2021).
- 595 32. Farrell, M. S. *et al.* Evaluating historical candidate genes for schizophrenia. *Mol Psychiatr* **20**,  
596 555–562 (2015).
- 597 33. Border, R. *et al.* No Support for Historical Candidate Gene or Candidate Gene-by-Interaction  
598 Hypotheses for Major Depression Across Multiple Large Samples. *Am J Psychiat* **176**, 376–387  
599 (2019).
- 600 34. Duncan, L. E., Ostacher, M. & Ballon, J. How genome-wide association studies (GWAS) made  
601 traditional candidate gene studies obsolete. *Neuropsychopharmacol* **44**, 1518–1523 (2019).
- 602 35. Ioannidis, J. P. A. Why Most Published Research Findings Are False. *Plos Med* **2**, e124 (2005).
- 603 36. Markowitz, J. E. *et al.* Spontaneous behaviour is structured by reinforcement without  
604 explicit reward. *Nature* **614**, 108–117 (2023).
- 605 37. Cui, T. *et al.* Gene–gene interaction detection with deep learning. *Commun. Biol.* **5**, 1238  
606 (2022).
- 607 38. Fang, G. *et al.* Discovering genetic interactions bridging pathways in genome-wide  
608 association studies. *Nat. Commun.* **10**, 4274 (2019).
- 609 39. Skutt-Kakaria, K., Reimers, P., Currier, T. A., Werkhoven, Z. & Bivort, B. L. de. A neural circuit  
610 basis for context-modulation of individual locomotor behavior. *bioRxiv* 797126 (2019)  
611 doi:10.1101/797126.
- 612 40. Ayroles, J. F. *et al.* Behavioral idiosyncrasy reveals genetic control of phenotypic variability.  
613 *Proc National Acad Sci* **112**, 6706–6711 (2015).
- 614 41. Werkhoven, Z. *et al.* The structure of behavioral variation within a genotype. *eLife* **10**,  
615 e64988 (2021).
- 616 42. Akhund-Zade, J., Ho, S., O’Leary, C. & Bivort, B. de. The effect of environmental enrichment  
617 on behavioral variability depends on genotype, behavior, and type of enrichment. *J. Exp. Biol.*  
618 **222**, jeb202234 (2019).
- 619 43. Bivort, B. de *et al.* Precise Quantification of Behavioral Individuality From 80 Million  
620 Decisions Across 183,000 Flies. *Front. Behav. Neurosci.* **16**, 836626 (2022).

- 621 44. Daw, N. D., Gershman, S. J., Seymour, B., Dayan, P. & Dolan, R. J. Model-Based Influences on  
622 Humans' Choices and Striatal Prediction Errors. *Neuron* **69**, 1204–1215 (2011).
- 623 45. Akam, T. *et al.* The Anterior Cingulate Cortex Predicts Future States to Mediate Model-  
624 Based Action Selection. *Neuron* **109**, 149-163.e7 (2020).
- 625 46. Silva, C. F. da & Hare, T. A. Humans primarily use model-based inference in the two-stage  
626 task. *Nat. Hum. Behav.* **4**, 1053–1066 (2020).
- 627 47. Kim, S. M. & Frank, L. M. Hippocampal Lesions Impair Rapid Learning of a Continuous Spatial  
628 Alternation Task. *Plos One* **4**, e5494 (2009).
- 629 48. Singer, A. C., Carr, M. F., Karlsson, M. P. & Frank, L. M. Hippocampal SWR Activity Predicts  
630 Correct Decisions during the Initial Learning of an Alternation Task. *Neuron* **77**, 1163–1173  
631 (2013).
- 632 49. Kay, K. *et al.* Constant Sub-second Cycling between Representations of Possible Futures in  
633 the Hippocampus. *Cell* **180**, 552-567.e25 (2020).
- 634 50. Fernández-Ruiz, A. *et al.* Long-duration hippocampal sharp wave ripples improve memory.  
635 *Science* **364**, 1082–1086 (2019).
- 636 51. Sigurdsson, T., Stark, K. L., Karayiorgou, M., Gogos, J. A. & Gordon, J. A. Impaired  
637 hippocampal–prefrontal synchrony in a genetic mouse model of schizophrenia. *Nature* **464**,  
638 763–767 (2010).
- 639 52. Kastner, D. B., Gillespie, A. K., Dayan, P. & Frank, L. M. Memory alone does not account for  
640 the speed of learning of a simple spatial alternation task in rats. *J Neurosci* **40**, JN-RM-0972-20  
641 (2020).
- 642 53. Sanders, S. J. *et al.* De novo mutations revealed by whole-exome sequencing are strongly  
643 associated with autism. *Nature* **485**, 237–241 (2012).
- 644 54. Satterstrom, F. K. *et al.* Large-Scale Exome Sequencing Study Implicates Both  
645 Developmental and Functional Changes in the Neurobiology of Autism. *Cell* **180**, 568-584.e23  
646 (2020).
- 647 55. Lord, C. *et al.* Autism spectrum disorder. *Nat. Rev. Dis. Prim.* **6**, 5 (2020).
- 648 56. Clarke, D., Romano, J. P. & Wolf, M. The Romano-Wolf Multiple Hypothesis Correction in  
649 Stata. *Ssrn Electron J* (2020) doi:10.2139/ssrn.3513687.

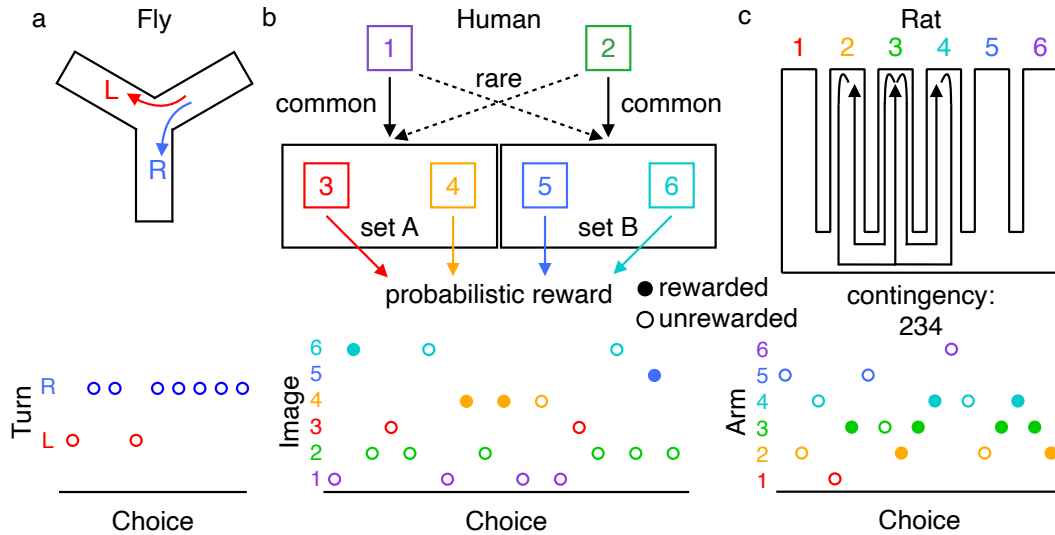

650 **Figure 1. Choice is a common discretization for behavior.** In the three behavioral tasks under  
651 consideration in this work, the actions of the subjects are broken down into a series of choices.  
652 (a) Fly y-maze (top), and example set of choices of left (red) and right (blue) turns (bottom) of  
653 an individual fly. Data come from Buchanan et al.<sup>4</sup>. (b) Two-step task, performed by human  
654 subjects (top), and an example set of choices of an individual subject (bottom). The colors  
655 correspond to the different objects chosen (bottom). Data come from Gillan et al.<sup>6</sup>. (c) Spatial  
656 alternation behavior, performed by rats (top), and an example set of choices of an individual rat  
657 (bottom). The contingency is defined as the 3 arms that can be rewarded, and the 6-arm track  
658 enables different sets of three arms to be rewarded. In b and c, filled in circles indicate that  
659 reward was received.

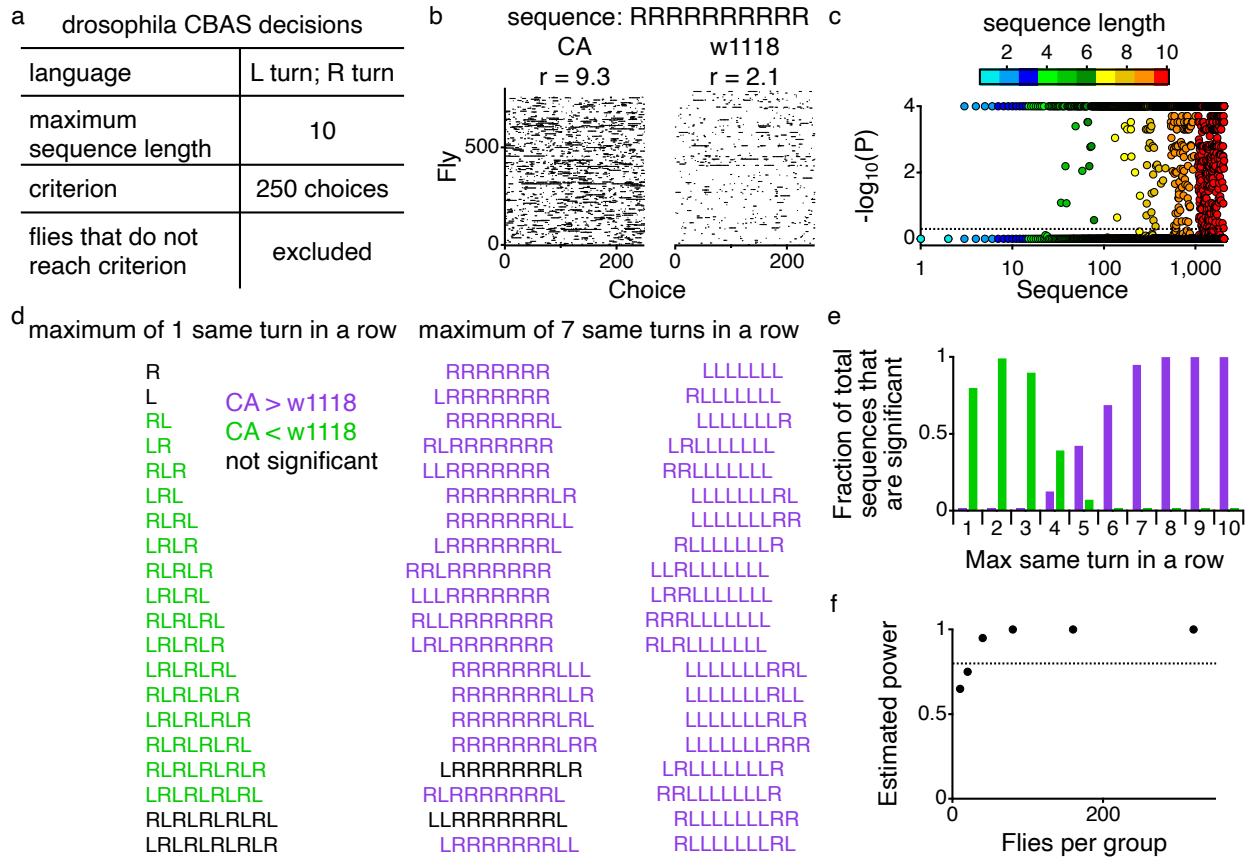

660 **Figure 2. CBAS applied to y-maze produces interpretable differences between fly strains.**  
661 CBAS was applied to flies tracked on a y-maze (Fig 1a) (a) This table demarcates the decisions  
662 made to perform the CBAS on this dataset. There was a total of 1,225 Cambridge-A (CA) and  
663 1,372 w1118 flies in the dataset, 466 CA and 565 w1118 were excluded from analysis due to  
664 not reaching a total of at least 250 turns. (b) The occurrence of a single sequence of turns (10  
665 right turns in a row) in the two strains during the first 250 turns. The rows show the occurrence  
666 of that sequence of turns for all individual flies from each strain. The CA strain has a rate of 9.3,  
667 meaning that, on average, each fly utilizes this sequence 9.3 times. The W1118 strain has a rate  
668 of 2.1, meaning that, on average, each fly utilizes this sequence 2.1 times. (c) CBAS Manhattan  
669 plot displays the p-value for each sequence. Each sequence has two p-values on this plot, one  
670 for CA > w1118, and the other for CA < w1118. The sequences are ordered based on the  
671 number of choices in the sequence, and they are displayed on a log scale to make all sequence  
672 lengths visible. Within a given sequence length, the sequences are ordered based on frequency  
673 of occurrence in the entire dataset. The horizontal dotted line indicates the significance  
674 threshold of 5% control of the median false discovery proportion. A total of 10,000 resamplings  
675 were used to calculate the p-values making the maximum value on the plot 4.00004  
676  $(-\log(\frac{1}{10,001}))$ . (d) Every sequence that either has a maximum of 1 turn in a direction in a row  
677 (left) or a maximum of 7 turns in the same direction in a row (right). Sequences are colored  
678 based on whether CBAS identifies them as occurring significantly more in the CA strain (purple),  
679 w1118 strain (green) or as not significantly different (black). The sequences on the right are  
680 aligned to the 7 right or left turns. (e) The maximum number of the same turns in a row was

681 calculated for every sequence in the dataset (2,046 total sequences), and for every number of  
682 maximum turns in a row, the fraction of sequences that whose prevalence was significantly  
683 greater in the CA strain (purple) or the w1118 strain (green) is plotted. The CA and w1118  
684 strains showed separation with other related metrics even for the max turns that show both  
685 significance for both direction of comparison (e.g. max same turn in a row of 4) (Fig S1a). (f)  
686 Power estimate for different sized groups of flies in each strain (see methods). Horizontal  
687 dotted line shows a value of 80%.

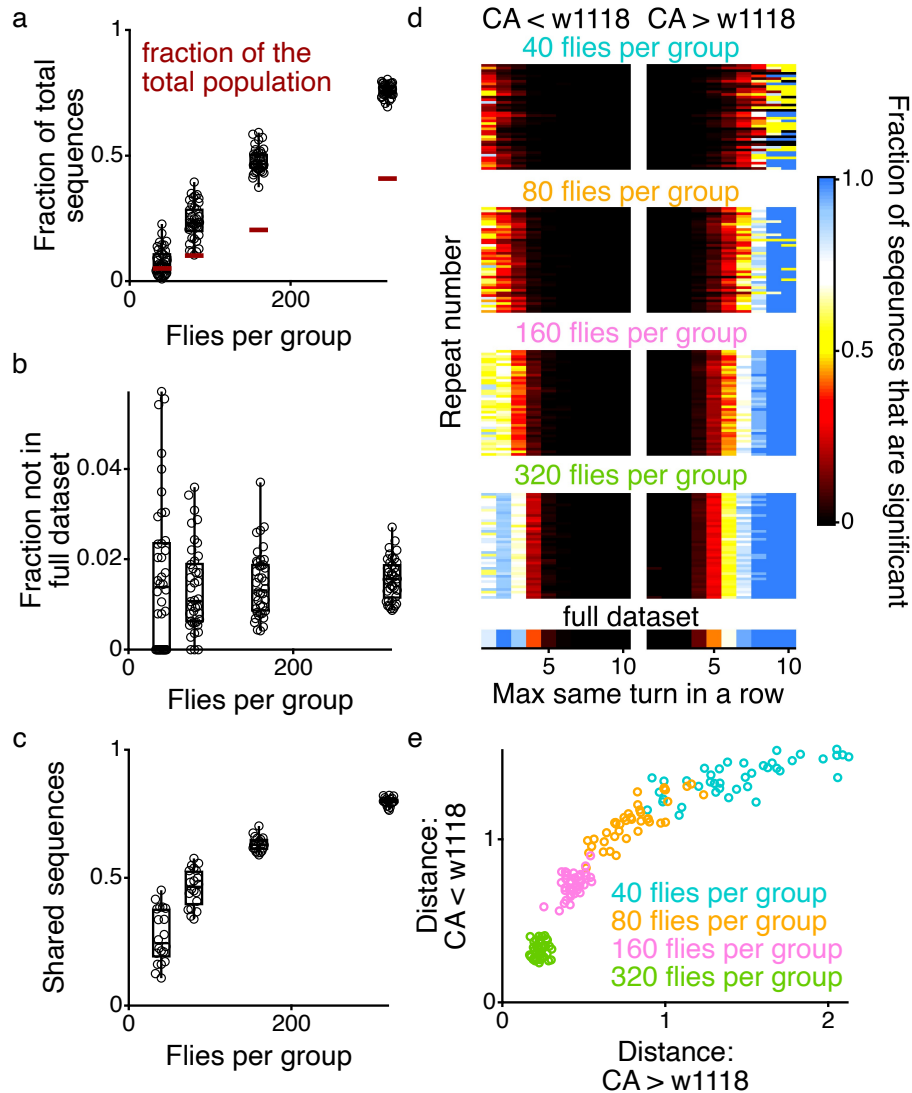

688 **Figure 3. Common, but degraded output with CBAS on smaller sample sizes.** For all panels in  
689 this figure, many repeats of smaller sample sizes were generated from the fly data used in Fig 2  
690 by resampling subjects (without replacement within a group) from the full dataset. (a) Each  
691 CBAS run on the smaller sample size identified some number of significant sequences. Those  
692 sequences were compared to the sequences identified in the CBAS on the full dataset, and the  
693 graph shows the ratios of the number of sequences identified by the smaller sample size that  
694 were also in the full dataset to the total number of sequences identified in the full dataset. As a  
695 comparison, the ratio of the number of flies in the smaller CBAS to the total number of flies in  
696 the dataset is plotted in the maroon horizontal lines. (b) The number of significant sequences  
697 identified in the smaller sample size that were not also identified in the full dataset is plotted  
698 over the total number of significant sequences identified in the smaller sample size. (c) In  
699 creating the smaller samples sizes, 20 paired sets of animals were generated that had no  
700 overlapping individuals. The number of the same significant sequences that were identified  
701 with these nonoverlapping sets of flies is plotted over the average number of significant  
702 sequences in the pair. (d) For each repeat of each sample size, all of the sequences were

703 categorized based on the maximum number of turns in the same direction and the fraction of  
704 significant sequences within those categories are plotted (as in Fig 2e). The bottom row of this  
705 plot is from the full dataset and is identical to Fig 2e. (e) The Euclidean distance between each  
706 row from panel **d** and the full dataset row is plotted. Colors correspond to the sample sizes as  
707 shown in panel **d**. For panels **a** – **c** data points are overlaid by box and whisker plots. The  
708 center line of the box displays the median of the data, the top and bottom lines of the box  
709 show the 25<sup>th</sup> and 75<sup>th</sup> quartiles, respectively, and the end of the whiskers show the full range  
710 of the data.



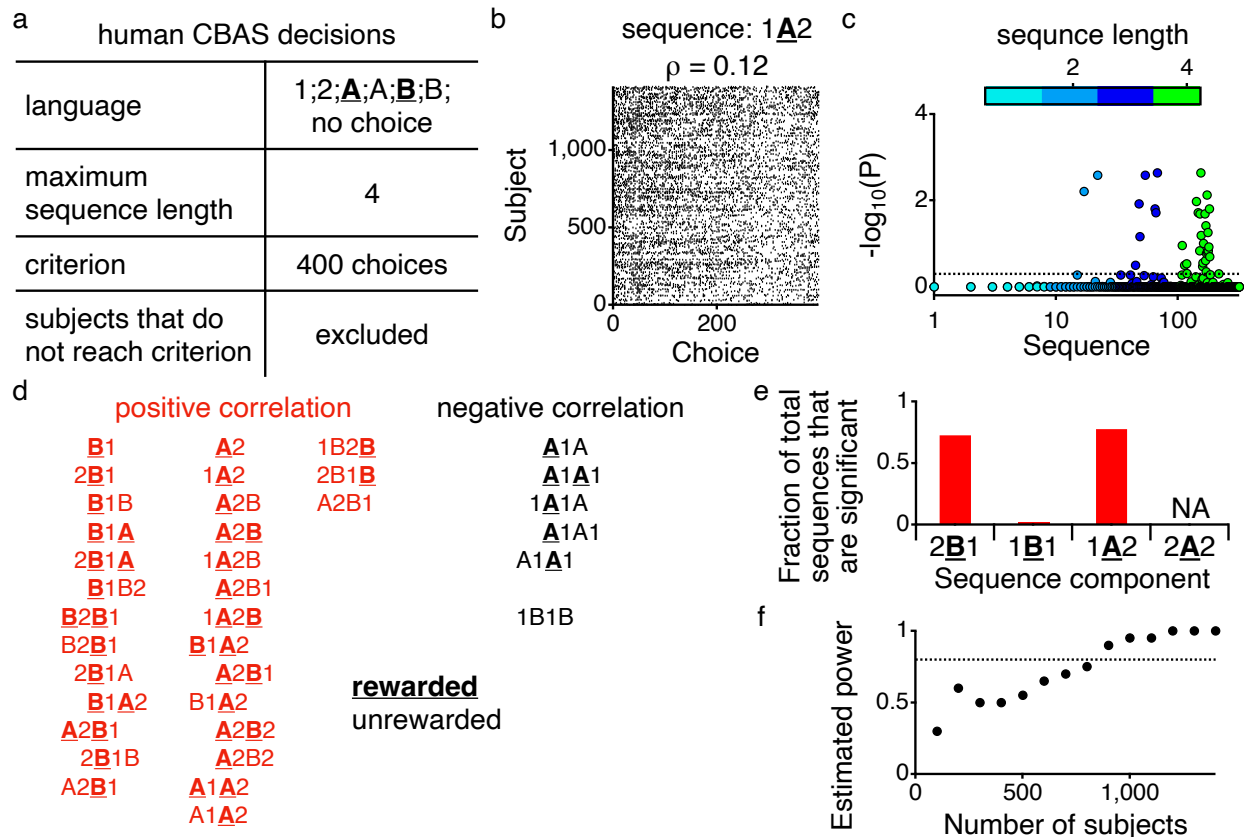

711 **Figure 4. CBAS identifies unexpected sequences in human dataset.** CBAS was applied to  
712 humans performing the two-step task (Fig 1b) (a) This table demarcates the decisions made to  
713 perform the CBAS on this dataset. There was a total of 1,413 human subjects in the dataset. (b)  
714 The occurrence of a single sequence of choices ('1A2', meaning choosing object 1, then getting  
715 rewarded for a choice in set A, then choosing object 2) across all subjects in the dataset.  
716 Subjects are ordered based on their factor 2 ("intrusive thoughts and compulsive behaviors")  
717 score. This sequence shows a correlation ( $\rho$ ) of 0.12 with factor 2 score from the questionnaire  
718 factor analysis (see S2a). (c) CBAS Manhattan plot displays the p-value for each sequence. Each  
719 sequence has two p-values on this plot, one for positive correlation and one for negative  
720 correlation. The sequences are ordered based on the number of choices in the sequence and  
721 are displayed on a log scale to make all sequence lengths visible. Within a given sequence  
722 length, the sequences are ordered based on frequency of occurrence in the entire dataset. The  
723 horizontal dotted line indicates the significance threshold of 5% control of the median false  
724 discovery proportion. A total of 10,000 resamplings were used to calculate the p-values making  
725 the maximum value on the plot  $4.00004 \left(-\log\left(\frac{1}{10,001}\right)\right)$ . (d) Every sequence that was  
726 significantly positively (left) or negatively (right) correlated with factor 2 score. The sequences  
727 on the left are aligned to B1 or A2, and sequences on the right are aligned to A1. (e) For the  
728 categories listed (2B1, 1B1, 1A2, 2A2), the number of significant sequences that contain the  
729 category is plotted over total number of sequences that exist in the dataset that contain the  
730 category. For 2A2 no subject in the dataset performed that sequence. (f) Power estimate for  
731 different sized groups of subjects (see methods). Horizontal dotted line shows a value of 80%.

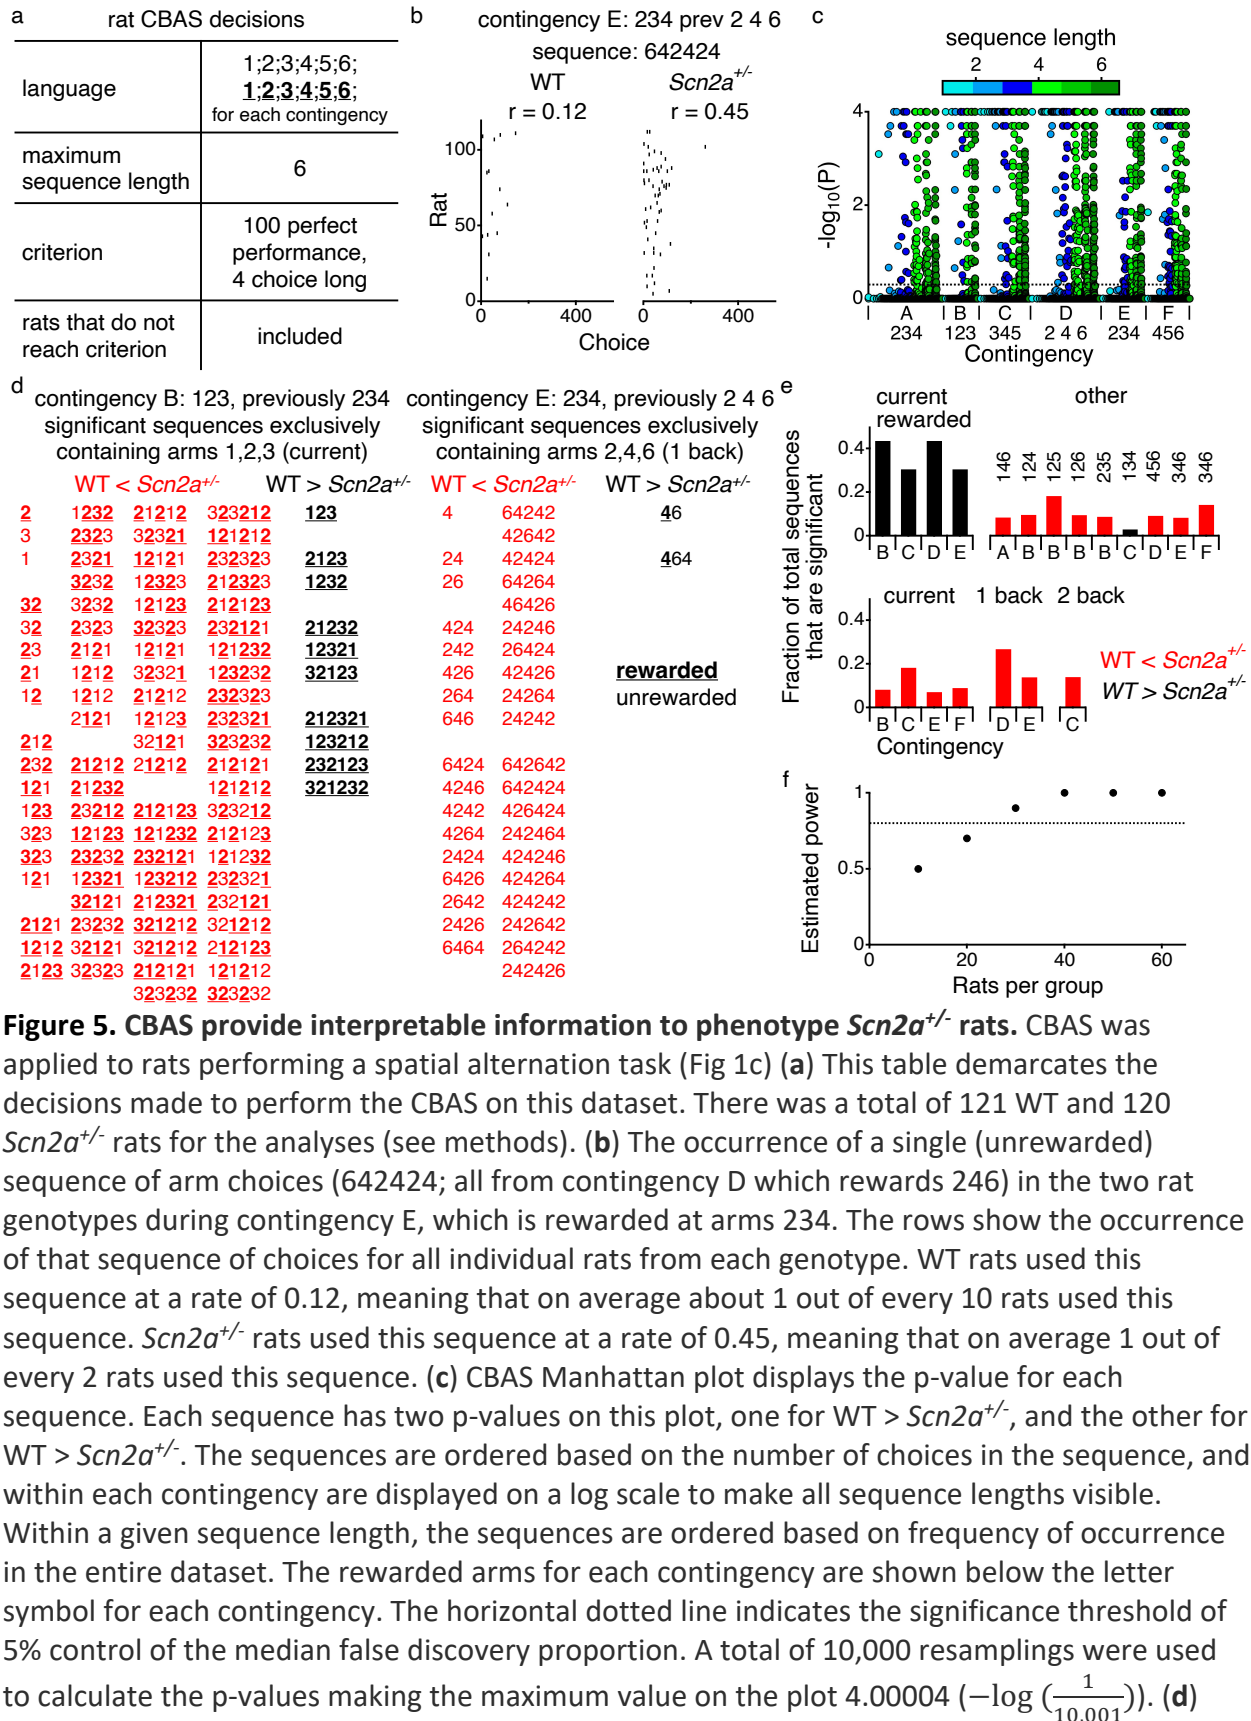

750 Every significant sequence that exclusively contains arms 1, 2, 3 (irrespective of reward) during  
751 contingency B (left) or every significant sequence that exclusively contains arms 2, 4, 6  
752 (irrespective of reward) during contingency E (right). Sequences that occur significantly more in  
753 *Scn2a<sup>+/-</sup>* are shown in red, and those that occur significantly more in WT are shown in black. (e)  
754 The sets of 3 arms which show a significantly greater fraction of significant sequences than  
755 would be expected by chance (see methods). The categories above each group of bar plots  
756 indicate the structure of the set of 3 arms. “Current” indicates the 3 arms from the current  
757 contingency irrespective of reward, “current rewarded” indicates the 3 arms from the current  
758 contingency all of which are rewarded, “1 back” indicates the 3 arms from the prior  
759 contingency, “2 back” indicate the 3 arms from 2 contingencies prior, and “other” are  
760 categories that show significant fractions that do not fit the other categories. Of note, the  
761 sequences in the “current rewarded” category are a subset of the sequences in the “current”  
762 category, as can be seen in panel **d**, left. (f) Power estimate for different sized groups of rats in  
763 each genotype (see methods). Horizontal dotted line shows a value of 80%.

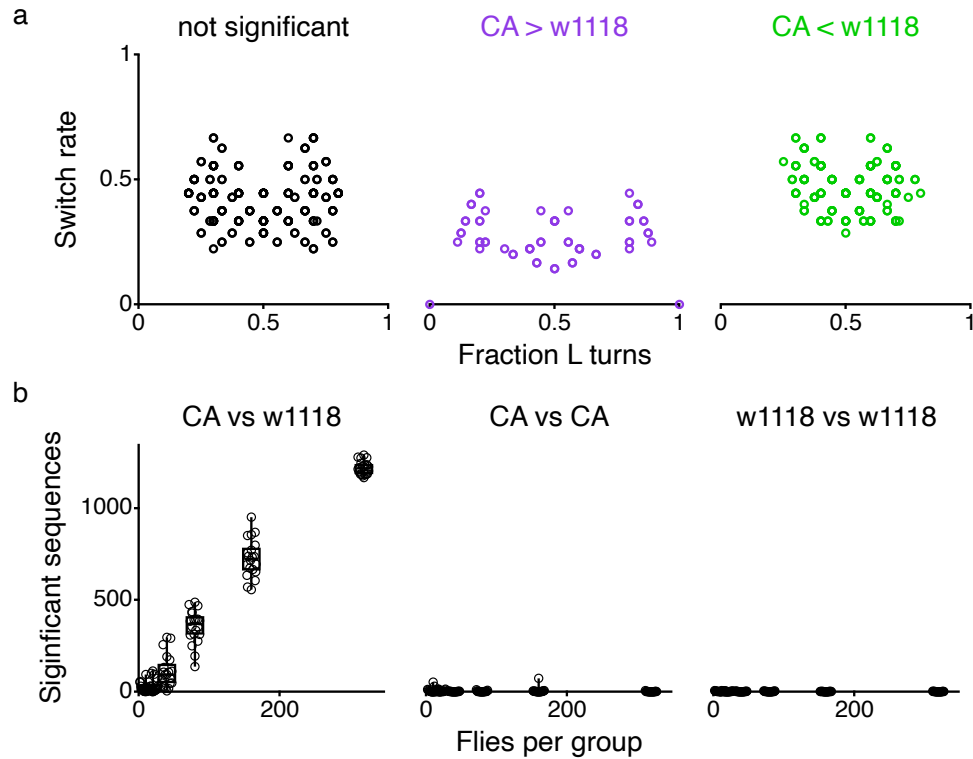

764 **Supplementary Figure 1.** (a) All sequences with a maximum length of 4 turns in the same  
765 direction in a row (Fig 2e) were evaluated for the fraction of L turns in the sequence  
766 (encompassing  $L = 4 - 8$ ) and the rate of switching (number of changes in turn direction divided  
767 by the total number of turns in the sequence). These two metrics show a separation in the  
768 sequences that were significantly greater in the CA strain compared to those that were  
769 significantly greater in the w1118 strain: the CA strain had sequences with more extreme  
770 fraction of left turns and lower switch rate, consistent with more turns in the same direction.  
771 (b) Left: the number of significant sequences when randomly resampling the populations  
772 without replacement and calculating CBAS on the smaller sample sizes. Middle: the number of  
773 significant sequences when comparing smaller samples sizes of the CA strain to itself, with  
774 nonoverlapping individuals in each group. Right: the number of significant sequences when  
775 comparing smaller samples sizes of the w1118 strain to itself, with nonoverlapping individuals  
776 in each group. Data points are overlaid by box and whisker plots. The center line of the box  
777 displays the median of the data, the top and bottom lines of the box show the 25<sup>th</sup> and 75<sup>th</sup>  
778 quartiles, respectively, and the end of the whiskers show the full range of the data.

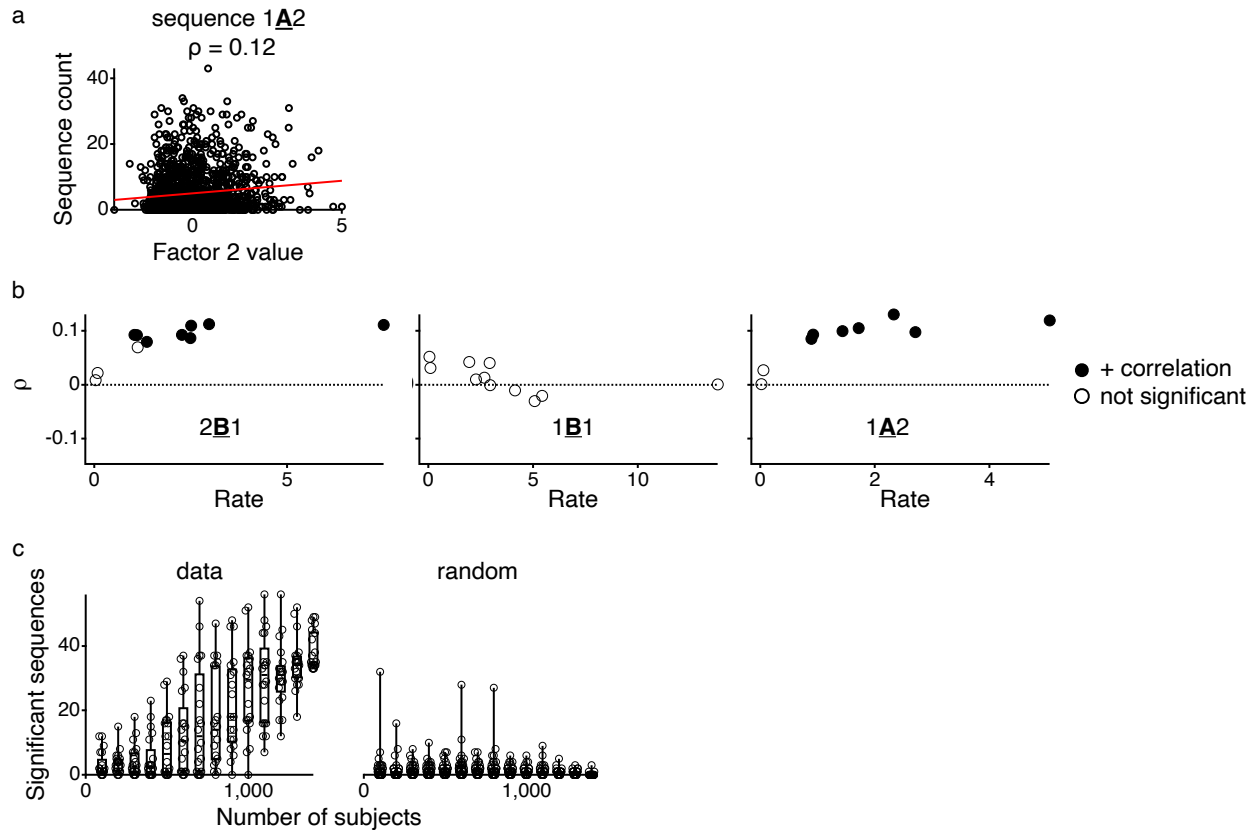

779 **Supplementary Figure 2.** (a) Correlation between the sequences count for each human subject  
780 and their factor 2 score for sequence: 1A2, which means choosing object 1, then making a  
781 choice in set A and getting rewarded, and then choosing object 2. Factor 2 reflects the intrusive  
782 thoughts and obsessive behavior loading on the psychiatric symptom questionnaires. Red line  
783 shows the linear fit to the data. (b) The correlation plotted as a function of the average  
784 sequence rate for all sequences containing the unit 2B1 (left), 1B1 (middle), or 1A2 (right).  
785 Filled in circles indicate those sequences that show a significant positive correlation. (c) Left:  
786 the number of significant sequences when randomly resampling the populations without  
787 replacement and calculating CBAS on the smaller sample sizes. Right: the number of significant  
788 sequence when randomly resampling the populations without replacement and comparing it to  
789 randomly generated factor 2 scores drawn from a distribution imputed from the original factor  
790 2 scores and calculating CBAS on the smaller sample sizes. Data points are overlaid by box and  
791 whisker plots. The center line of the box displays the median of the data, the top and bottom  
792 lines of the box show the 25<sup>th</sup> and 75<sup>th</sup> quartiles, respectively, and the end of the whiskers show  
793 the full range of the data.

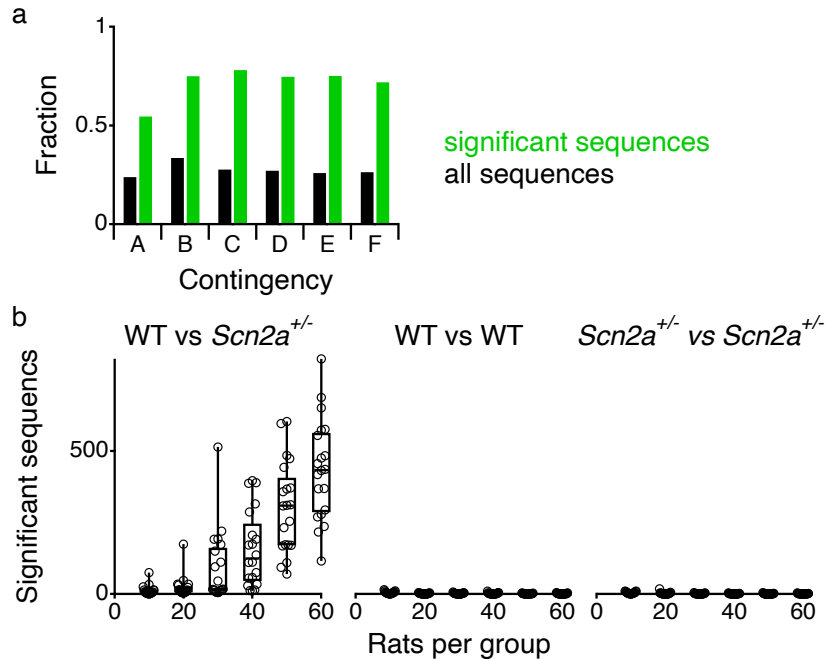

794 **Supplementary Figure 3.** (a) For the sequences that exclusively contain all sets of 3 arms (Fig  
795 5d&e) the fraction of the total number of sequences is plotted in black for each contingency, and the fraction of significant sequences that are a part of the sequences that exclusively  
796 contain all sets of 3 arms compared to the total number of significant sequences in each  
797 contingency is plotted in green. (b) Left: the number of significant sequences when randomly  
798 resampling the populations without replacement and calculating CBAS on the smaller sample  
799 sizes. Middle: the number of significant sequence when comparing smaller samples sizes of the  
800 WT genotype to itself, with nonoverlapping individuals in each group. Right: the number of  
801 significant sequence when comparing smaller samples sizes of the *Scn2a*<sup>+/-</sup> genotype to itself,  
802 with nonoverlapping individuals in each group. Data points are overlaid by box and whisker  
803 plots. The center line of the box displays the median of the data, the top and bottom lines of  
804 the box show the 25<sup>th</sup> and 75<sup>th</sup> quartiles, respectively, and the end of the whiskers show the full  
805 range of the data.  
806
